# Supplementary material
Source: PubMed Central journal article supplement (PMC3910600)
Supplement: 1311724111_pnas.201311724SI.pdf [file 1311724111_pnas.201311724SI.pdf]

# Supporting Information

Freeman et al. 10.1073/pnas.1311724111

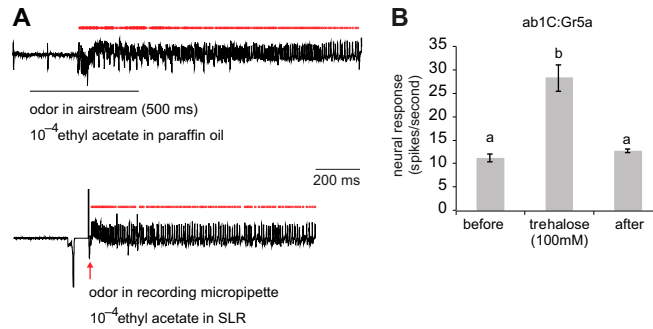

**Fig. S1.** (A) Representative traces from ab1 sensilla in control ( $w^{1118}$ ) flies using  $10^{-4}$  ethyl acetate in an airstream (*Upper*) or by placing it in the electrolyte of the recording electrode (*Lower*). Red dots indicate ab1A neuron spikes. (B) Mean responses of ab1C:Gr5a neurons to sensillum lymph ringer electrolyte before and immediately after recording with 100 mM trehalose. Each set of three recordings was taken from the same sensillum. Letters indicate statistical significance ( $P < 0.001$ ; one-way ANOVA with Tukey's post hoc test;  $n = 8$ ).

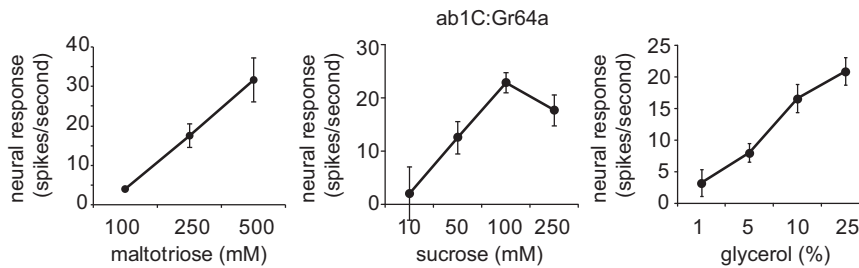

**Fig. S2.** Dose-dependent responses of ab1C:Gr64a neurons to indicated tastants ( $n = 6-12$ ).

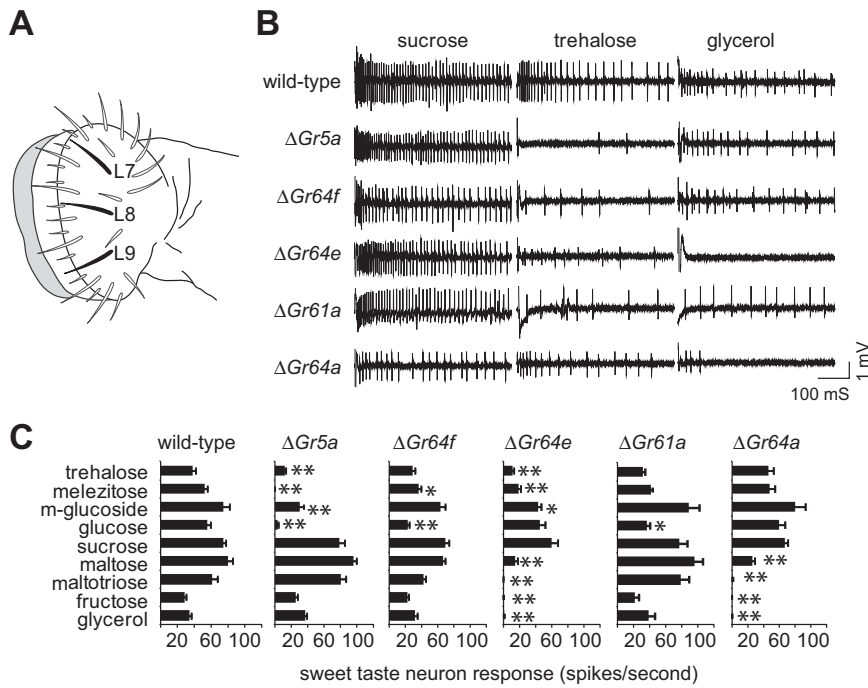

**Fig. S3.** (A) Schematic of the fly labellum highlighting L-type sensilla that were used for electrophysiological recordings in black. (B) Sample traces of recordings with 100 mM sweet stimuli obtained from L-type sensilla. Genotypes are as follows:  $w^{1118}$  (wild type),  $\Delta EP(X)-5$  ( $\Delta Gr5a$ ),  $Gr64f^{MB12243}$  ( $\Delta Gr64f$ ),  $Gr64e^{MB03533}$  ( $\Delta Gr64e$ ),  $Gr61a^1$  ( $\Delta Gr61a$ ), and  $Gr64a^1$  ( $\Delta Gr64a$ ). (C) Mean responses of sweet taste neurons in L-type sensilla to indicated sugars tested at a concentration of 1 M and glycerol at 50%. \* $P < 0.05$ ; \*\* $P < 0.001$  (vs. wild-type; one-way ANOVA with Tukey's post hoc test;  $n = 6-12$ ).

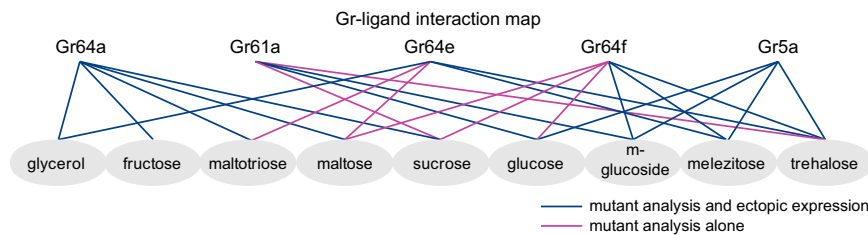

**Fig. S4.** A ligand–gustatory receptor (Gr) interaction map indicating relationships identified by mutant analysis and ectopic expression in the ab1C neuron.

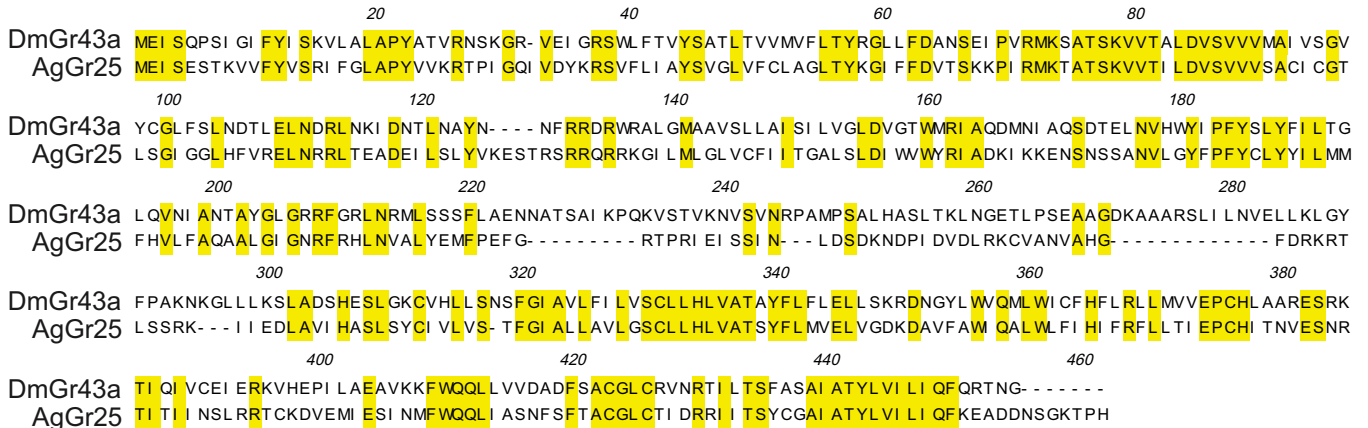

**Fig. S5.** Protein alignment of DmGr43a and AgGr25 with identical amino acids highlighted in yellow. Image was generated with MacVector and Gonnet alignment.

**Table S1. Gr combinations tested in ab3A neurons**

| Gr combination in ab3A neuron | Genotype                                                    | Gq | Stimulus            | Mean  | SEM  | <i>n</i> |
|-------------------------------|-------------------------------------------------------------|----|---------------------|-------|------|----------|
| Gr64a+Gr64f                   | UAS-Gr64a/UAS-Gr64f;                                        | +  | Trehalose           | 3     | 1.15 | 3        |
|                               | UAS-Gq/Or22a-GAL4                                           |    | Sucrose             | 0.00  | 0.00 | 3        |
| Gr5a+Gr64f                    | UAS-Gr5a/UAS-Gr64f-2;<br>UAS-Gq/Or22a-GAL4                  | +  | Trehalose           | 1.33  | 0.33 | 3        |
|                               |                                                             |    | Melezitose          | 0.33  | 0.33 | 3        |
|                               |                                                             |    | <i>m</i> -glucoside | 0.67  | 0.88 | 3        |
| Gr64a+Gr43a                   | UAS-Gr64a/UAS-Gr43a;<br>UAS-Gq/Or22a-GAL4                   | +  | Sucrose             | -1.00 | 0.00 | 3        |
|                               |                                                             |    | Glucose             | 0.50  | 0.29 | 4        |
|                               |                                                             |    | Fructose            | 0.75  | 0.48 | 4        |
| Gr64a+Gr64e                   | UAS-Gr64a/UAS-Gr64e;<br>UAS-Gq/Or22a-GAL4                   | +  | Sucrose             | 0.25  | 0.25 | 4        |
|                               |                                                             |    | Glycerol            | 0.00  | 0.00 | 4        |
| Gr64a+Gr64f+Gr64e             | UAS-Gr64a/UAS-Gr64e;<br>UAS-Gr64f/Or22a-GAL4                | -  | Trehalose           | 0.83  | 0.17 | 3        |
|                               |                                                             |    | Melezitose          | 1.17  | 0.60 | 3        |
|                               |                                                             |    | <i>m</i> -glucoside | 0.67  | 1.76 | 3        |
|                               |                                                             |    | Glucose             | 0.67  | 0.33 | 3        |
| Gr64a+Gr43a+Gr64e             | UAS-Gr64a/UAS-Gr64e;<br>UAS-Gr43a/Or22a-GAL4                | -  | Sucrose             | 0.33  | 0.33 | 3        |
|                               |                                                             |    | Fructose            | 2.00  | 0.00 | 3        |
|                               |                                                             |    | Glycerol            | 1.33  | 0.33 | 3        |
| Gr64a+Gr21a+Gr63a             | UAS-Gr64a/ $\Delta$ halo;<br>UAS-Gr63a,UAS-Gr21a/Or22a-GAL4 | -  | Sucrose             | -0.33 | 0.88 | 3        |
|                               |                                                             |    | Fructose            | 3.33  | 0.88 | 3        |
|                               |                                                             |    | Glycerol            | 0.00  | 1.00 | 3        |
| Gr64a+Gr43a+Gr64e+Gr64f       | UAS-Gr64a/UAS-Gr64e, UAS-Gr64f;<br>UAS-Gr43a/Or22a-GAL4     | -  | Sucrose             | 2.00  | 0.58 | 3        |
|                               |                                                             |    | Maltose             | 5.25  | 0.85 | 4        |
|                               |                                                             |    | Maltotriose         | 2.25  | 0.48 | 4        |
| Gr64a+Gr21a+Gr63a+Gr43a       | UAS-Gr64a/UAS-Gr43a;<br>UAS-Gr63a,UAS-Gr21a/Or22a-GAL4      | -  | Sucrose             | 2.88  | 0.52 | 4        |
|                               |                                                             |    | Maltose             | 3.38  | 0.90 | 4        |
|                               |                                                             |    | Maltotriose         | 1.75  | 0.48 | 4        |
| Gr5a+Gr64e+Gr64f+Gr64e        | UAS-Gr5a/UAS-Gr64e, UAS-Gr64f;<br>UAS-Gr64b/Or22a-GAL4      | -  | Trehalose           | 0.88  | 0.59 | 4        |
|                               |                                                             |    | Melezitose          | -1.00 | 0.91 | 4        |
|                               |                                                             |    | <i>m</i> -glucoside | 0.00  | 0.00 | 4        |
|                               |                                                             |    |                     | -0.50 | 0.74 | 4        |

**Table S2. Genotypes and sources of flies used in experiments**

| Fly stocks                          | Genotype and/or source                                                                                          | Figures                                  | References |
|-------------------------------------|-----------------------------------------------------------------------------------------------------------------|------------------------------------------|------------|
| Wild-type                           | <i>w[1118]</i>                                                                                                  | 3A; S3                                   |            |
| Gr21a-GAL4                          | Kristin Scott                                                                                                   |                                          | 1          |
| Gr63a-GAL4 on III                   | BDSC (no. 9942)                                                                                                 |                                          | 2          |
| Gr63a-GAL4 on II                    | BDSC (no. 9943)                                                                                                 |                                          | 2          |
| $\Delta$ Gr63a                      | BDSC (no. 9941)                                                                                                 |                                          | 2          |
| UAS-Gr5a                            | A.D. laboratory                                                                                                 |                                          | 3          |
| UAS-Gr61a                           | A.D. laboratory                                                                                                 |                                          | 3          |
| UAS-Gr64a                           | A.D. laboratory                                                                                                 |                                          | 3          |
| UAS-Gr64b                           | BDSC (no. 27324)                                                                                                |                                          | 4          |
| UAS-Gr64c                           | A.D. laboratory                                                                                                 |                                          |            |
| UAS-Gr64d                           | A.D. laboratory                                                                                                 |                                          |            |
| UAS-Gr64e                           | A.D. laboratory                                                                                                 |                                          | 3          |
| UAS-Gr64f                           | A.D. laboratory                                                                                                 |                                          | 3          |
| UAS-Gr59c                           | Carlson laboratory                                                                                              |                                          | 5          |
| $\Delta$ Gr5a                       | $\Delta$ EP(X)-5                                                                                                | 3 A, B, and C; S3                        | 6          |
| $\Delta$ Gr64f                      | <i>Gr64f[MB12243]</i> , BDSC (#27883)                                                                           | 3 A, B, and C; S3                        |            |
| $\Delta$ Gr64e                      | <i>Gr64e[MB03533]</i> , BDSC (#23628)                                                                           | 3 A, B, and C; S3                        | 7          |
| $\Delta$ Gr61a                      | <i>Gr61a[1]</i>                                                                                                 | 3 A, B, and C; S3                        | 3          |
| $\Delta$ Gr64a                      | <i>Gr64a[1]</i>                                                                                                 | 3 A, B, and C; S3                        | 3          |
| ab1C:Gr5a-2x<br>(same as ab1C:Gr5a) | <i>UAS-Gr5a-8/UAS-Gr5a-8; Gr63a-GAL4/Gr63a-GAL4</i>                                                             | 1 B-D and F; 2 A and C;<br>3 B and C; S1 |            |
| ab1C:Gr5a-1x                        | <i>UAS-Gr5a-8/+; Gr63a-GAL4/+</i>                                                                               | 1 C and E; 2B                            |            |
| Gr63a-GAL4                          | <i>UAS-Gr5a-8/+; Gr63a-GAL4/+</i>                                                                               | 1 C and E                                |            |
| Gr21a-GAL4                          | <i>Gr21a-GAL4/+; UAS-Gr5a-3/+</i>                                                                               | 1E                                       |            |
| +Gr63a                              | <i>UAS-Gr5a-8/UAS-Gr5a-8; Gr63a-GAL4/Gr63a-GAL4</i>                                                             | 1F                                       |            |
| -Gr63a                              | <i>UAS-Gr5a-8/UAS-Gr5a-8; <math>\Delta</math>Gr63a,Gr63a-GAL4/<math>\Delta</math>Gr63a,<br/>Gr63a-GAL4</i>      | 1F                                       |            |
| ab1C                                | <i>w[1118]</i>                                                                                                  | 2A; 4 A, C, and E; S1                    |            |
| ab1C:Gr64f                          | <i>UAS-Gr64f-2/UAS-Gr64f-2; Gr63a-GAL4/Gr63a-GAL4</i>                                                           | 2 A and C; 3 B and C                     |            |
| ab1C:Gr64e                          | <i>UAS-Gr64e-3/UAS-Gr64e-3; Gr63a-GAL4/Gr63a-GAL4</i>                                                           | 2 A and C; 3 B and C                     |            |
| ab1C:Gr64b                          | <i>UAS-Gr64b/Gr21a-GAL4; UAS-Gr64b-2/Gr63a-GAL4</i>                                                             | 2 A and C; 3 B and C                     |            |
| ab1C:Gr61a                          | <i>UAS-Gr61a-2/Gr21a-GAL4; Gr63a-GAL4/UAS-Gr61a-4</i>                                                           | 2 A and C; 3 B and C                     |            |
| ab1C:Gr64a                          | <i>UAS-Gr64a-4/UAS-Gr64a-4; Gr63a-GAL4/Gr63a-GAL4</i>                                                           | 2 A and C; 3 B and C; S2                 |            |
| ab1C:Gr64c                          | <i>Gr21a-GAL4/UAS-Gr64c-B; Gr63a-GAL4/UAS-Gr64c-2</i>                                                           | 2 A and C                                |            |
| ab1C:Gr64d                          | <i>Gr21a-GAL4/UAS-Gr64d-4; Gr63a-GAL4/UAS-Gr64d-3</i>                                                           | 2 A and C                                |            |
| ab1C:Gr5a+Gr64f                     | <i>Gr21a-GAL4/UAS-Gr5a-8; Gr63a-GAL4/UAS-Gr64f-3</i>                                                            | 2B                                       |            |
| ab1C:Gr5a+Gr64e                     | <i>Gr21a-GAL4/UAS-Gr5a-8; Gr63a-GAL4/UAS-Gr64e-2L</i>                                                           | 2B                                       |            |
| ab1C:Gr5a+Gr64a                     | <i>UAS-Gr5a-8/UAS-Gr64a-4; Gr63a-GAL4/Gr63a-GAL4</i>                                                            | 2B                                       |            |
| ab1C:Gr5a+Gr61a                     | <i>UAS-Gr5a-8/UAS-Gr61a-2; Gr63a-GAL4/Gr63a-GAL4</i>                                                            | 2B                                       |            |
| ab1C:Gr5a+Gr64b                     | <i>Gr21a-GAL4/UAS-Gr5a-8; Gr63a-GAL4/UAS-Gr64b-2</i>                                                            | 2B                                       |            |
| ab1C:Gr5a+Gr64c                     | <i>Gr21a-GAL4/UAS-Gr5a-8; Gr63a-GAL4/UAS-Gr64c-2</i>                                                            | 2B                                       |            |
| ab1C:Gr5a+Gr64d                     | <i>UAS-Gr5a-8/UAS-Gr64d-4; Gr63a-GAL4/Gr63a-GAL4</i>                                                            | 2B                                       |            |
| ab1C:Gr59c                          | <i>Gr21a-GAL4/Gr63a-GAL4;UAS-59c-9d,UAS-Gr9c-9d</i>                                                             | 4 A-C                                    |            |
| +Gr63a                              | <i>Gr21a-GAL4/Gr63a-GAL4;UAS-59c-9d,UAS-Gr9c-9d</i>                                                             | 4C                                       |            |
| -Gr63a                              | <i>UAS-Gr59c-14d/UAS-Gr5c-14d; <math>\Delta</math>Gr63a,Gr63a-GAL4/<math>\Delta</math>Gr63a,<br/>Gr63a-GAL4</i> | 4C                                       |            |
| ab1C:DmGr43a                        | <i>UAS-Gr43a-8d/Gr21a-GAL4; Gr63a-GAL4/UAS-Gr43a-5d</i>                                                         | 4 D and E                                |            |
| ab1C:AgGr25                         | <i>Gr21a-GAL4/Gr63a-GAL4; UAS-AgGr25-3D/UAS-AgGr25-3L</i>                                                       | 4E                                       |            |

BDSC, Bloomington *Drosophila* Stock Center.

1. Scott K, et al. (2001) A chemosensory gene family encoding candidate gustatory and olfactory receptors in *Drosophila*. *Cell* 104(5):661-673.
2. Jones WD, Cayirlioglu P, Kadow IG, Vosshall LB (2007) Two chemosensory receptors together mediate carbon dioxide detection in *Drosophila*. *Nature* 445(7123):86-90.
3. Dahanukar A, Lei YT, Kwon JY, Carlson JR (2007) Two *Gr* genes underlie sugar reception in *Drosophila*. *Neuron* 56(3):503-516.
4. Jiao Y, Moon SJ, Montell C (2007) A *Drosophila* gustatory receptor required for the responses to sucrose, glucose, and maltose identified by mRNA tagging. *Proc Natl Acad Sci USA* 104(35):14110-14115.
5. Weiss LA, Dahanukar A, Kwon JY, Banerjee D, Carlson JR (2011) The molecular and cellular basis of bitter taste in *Drosophila*. *Neuron* 69(2):258-272.
6. Dahanukar A, Foster K, van der Goes van Naters WM, Carlson JR (2001) A *Gr* receptor is required for response to the sugar trehalose in taste neurons of *Drosophila*. *Nat Neurosci* 4(12):1182-1186.
7. Wisotsky Z, Medina A, Freeman E, Dahanukar A (2011) Evolutionary differences in food preference rely on Gr64e, a receptor for glycerol. *Nat Neurosci* 14(12):1534-1541.
